# Supplementary material
Source: Springer Nature journal article supplement (https://www.springermedizin.de/resource/supplementary/13069_2013_130_MOESM4_ESM.pdf/9659844)

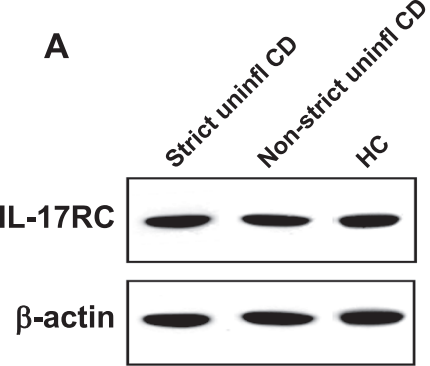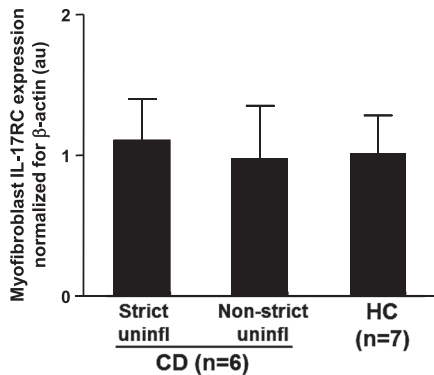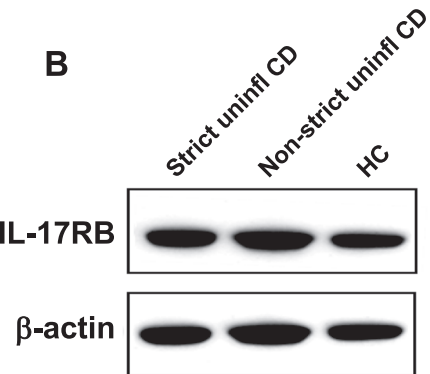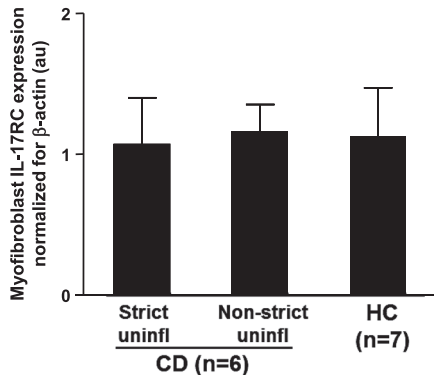

Supplement: MOESM4 [file 9659844]
